# Supplementary material for: Screening frost-tolerant sunflower hybrids: integrating physiological traits and electrolyte leakage analysis
Source: PeerJ. 2025 Nov 7;13:e20282. doi: 10.7717/peerj.20282 (PMC12599371; doi:10.7717/peerj.20282)
Supplement: Supplemental Information 1 — Each data point plotted indicates the average mean of 4 replicates of V2-V4 periods. All replicates are included. [file peerj-13-20282-s001.xlsx]

## Sheet: Raw Data
Replication	Cultivars	Frost	SPAD	Leaf temp	RWC	Dry matter	EL	Turgor loss	Damaged%	Dead %
1	1	1	35.4	18.8	85.5	16.2	47.8	10.72	80	60
2	1	1	33.1	19.6	90	16.6	50.1	8.44	80	80
3	1	1	35.4	18.8	85.5	16.2	50.4	10.72	83	83
4	1	1	33.1	19.6	90	16.6	50.4	8.44	80	70
1	2	1	36.9	21.2	93.1	15.2	21.6	6.89	40	0
2	2	1	33.4	21.6	99.2	14.3	27.2	5.68	20	0
3	2	1	36.9	21.2	93.1	15.2	21.6	6.89	50	33
4	2	1	33.4	21.6	99.2	14.3	27.2	5.68	30	10
1	3	1	37.1	21.2	98.4	12.3	28.5	15.07	0	0
2	3	1	37.6	19.8	94.2	13.9	20.7	14.52	0	0
3	3	1	37.1	21.2	96.8	12.3	28.5	15.07	17	0
4	3	1	37.6	19.8	98.6	13.9	20.7	14.52	0	0
1	4	1	32.9	26.1	66.4	17.3	29.7	29.47	20	0
2	4	1	35.5	26.2	69.6	17.5	29.1	26.46	20	0
3	4	1	32.9	26.1	66.4	17.3	29.7	29.47	0	0
4	4	1	35.5	26.2	69.6	17.5	29.1	26.46	10	0
1	5	1	36	21.3	80.9	10.5	21.3	18.54	0	0
2	5	1	37.6	20.3	70.3	18	25.5	22.31	0	0
3	5	1	36	21.3	80.9	10.5	21.3	18.54	17	0
4	5	1	37.6	20.3	70.3	18	25.5	22.31	0	0
1	6	1	43.1	27.1	70.5	17.6	32.1	25.68	0	0
2	6	1	47.8	26.7	75	17.8	39.6	21.5	40	40
3	6	1	43.1	27.1	70.5	17.6	32.1	25.68	17	0
4	6	1	47.8	26.7	75	17.8	39.6	21.5	10	10
1	7	1	35.1	22.9	84.4	15.5	24.5	13.47	40	40
2	7	1	36.7	23	84.3	14.6	30	13.74	20	20
3	7	1	35.1	22.9	84.4	15.5	24.5	13.47	40	40
4	7	1	36.7	23	84.3	14.6	30	13.74	20	20
1	8	1	35.7	22.9	92.3	13	27.4	8.24	0	0
2	8	1	36.8	23.4	85.9	13.8	31.6	10.07	0	0
3	8	1	35.7	22.9	92.3	13	27.4	8.24	20	0
4	8	1	36.8	23.4	85.9	13.8	31.6	10.07	20	0
1	9	1	39.3	23.4	94.9	12.9	22.5	8.76	60	40
2	9	1	38.8	23.6	86.3	14	21.6	9.7	60	60
3	9	1	39.3	23.4	94.9	12.9	22.5	8.76	80	40
4	9	1	38.8	23.6	86.3	14	21.6	9.7	60	40
1	10	1	35.4	24.3	85.1	14	27	13.12	60	30
2	10	1	31.5	24.5	86.4	14	30.7	11.96	100	60
3	10	1	35.4	24.3	85.1	14	27	13.12	100	60
4	10	1	31.5	24.5	86.4	14	30.7	11.96	60	30
1	11	1	33.8	20.8	88.6	15.3	40.1	9.83	80	40
2	11	1	32.9	21.2	88	15	41.1	10.41	20	0
3	11	1	33.8	20.8	88.6	15.3	40.1	9.83	67	17
4	11	1	32.9	21.2	88	15	41.1	10.41	40	10
1	12	1	34.7	20.8	89.6	24.3	30	8.83	40	20
2	12	1	35.4	20.4	96.9	15	25.4	9.77	20	0
3	12	1	34.7	20.8	89.6	24.3	30	8.83	50	0
4	12	1	35.4	20.4	96.9	15	25.4	9.77	20	20
1	13	1	38.8	19.5	78.1	15.7	40.8	17.69	40	20
2	13	1	36.9	18.4	84.9	15.6	41.8	14.45	20	0
3	13	1	38.8	19.5	78.1	15.7	40.8	17.69	33	0
4	13	1	36.9	18.4	84.9	15.6	41.8	14.45	30	0
1	14	1	34.6	20.9	79.4	15.7	39.5	17.99	80	20
2	14	1	34.1	20	78.1	16.3	39.4	19.02	60	20
3	14	1	34.6	20.9	79.4	15.7	39.5	17.99	67	33
4	14	1	34.1	20	78.1	16.3	39.4	19.02	60	20
1	1	2	40.7	23.3	88.2	15.6	49.3	10.11
2	1	2	40.7	21.3	92.3	14.6	50.5	9.57
3	1	2	40.3	21.6	86.6	15.7	49.3	11.59
4	1	2	40.7	23.3	88.2	15.6	50.5	10
1	2	2	36.3	24.7	85.4	14	38.6	12.81
2	2	2	36.8	23.9	87.1	14.4	30.1	11.23
3	2	2	37.7	24.1	97	14.2	41.1	12.81
4	2	2	36.3	24.7	87.1	14.4	38.6	11.23
1	3	2	34.8	23.8	94.4	14.2	21.2	4.88
2	3	2	34.2	23.9	98.3	13.1	19.3	3.51
3	3	2	33.1	23.8	104.8	12.9	21.9	4.46
4	3	2	34.8	23.8	98.3	13.1	21.2	4
1	4	2	34.4	26	74.4	15.1	31.1	22.59
2	4	2	33.5	26.3	69.1	15	39.5	25.43
3	4	2	34.9	26.4	82	13.4	29.6	20.38
4	4	2	34.4	26	74.4	15.1	31.1	22
1	5	2	36.3	23.5	95	13.9	24	4.33
2	5	2	35.5	23.2	94	14.5	23.5	5.15
3	5	2	35.2	22.4	99.1	14.7	30.5	4.12
4	5	2	36.3	23.5	95	13.9	24	4
1	6	2	36.7	26.4	81.6	14.9	38.1	16.13
2	6	2	39	26.5	77.1	15.6	45.8	20.03
3	6	2	36.5	26.5	76.8	15.5	36	20.3
4	6	2	36.7	26.4	77.1	15.6	38.1	20
1	7	2	39.4	20.4	85.8	15.9	50.1	12.24
2	7	2	39.1	20.1	84.4	15	36.7	13.55
3	7	2	38.2	20	83.1	15.3	42.7	14.7
4	7	2	39.4	20.4	84.4	15	42.7	13
1	8	2	35.2	20.2	85.7	14.7	29.6	12.49
2	8	2	35.4	20.8	84.4	13.1	34.6	13.82
3	8	2	35.2	21.1	80.3	16.3	29.6	16.15
4	8	2	35.2	20.2	85.7	14.7	34.6	14
1	9	2	40.1	20.7	90	12.4	53.1	8.89
2	9	2	43.9	20.9	99.1	10.8	58.4	8.96
3	9	2	40	20.9	86.9	13.5	54	11.53
4	9	2	40.1	20.7	90	12.4	54	9
1	10	2	40.3	21.5	85.7	13.6	61.6	12.61
2	10	2	43.4	22.7	86	15.6	68.8	12.06
3	10	2	40.8	21.7	87.7	13.6	58.5	10.81
4	10	2	40.3	21.5	86	15.6	61.6	11
1	11	2	39.1	21.4	86.3	15.7	59.8	11.83
2	11	2	37.5	21	88.8	15.2	60	9.63
3	11	2	39.9	19.8	81.7	16.4	58.4	12.49
4	11	2	39.1	21.4	86.3	15.7	59.8	11
1	12	2	38.2	22.1	92.5	10.4	45.6	6.1
2	12	2	36.1	21.7	93.8	15.2	44.2	8
3	12	2	39	21.6	89.6	14.5	55.1	6.09
4	12	2	38.2	22.1	91.3	14.5	45.6	6
1	13	2	37.1	20.2	84.3	14.6	59.6	13.75
2	13	2	35.6	20.1	84.3	14.2	58.7	13.78
3	13	2	36.6	20.2	84.2	15.6	58.7	13.64
4	13	2	37.1	20.2	84.3	14.2	58.7	13
1	14	2	38	20.3	87.5	14.6	60.5	10.84
2	14	2	35.8	21.4	86.6	14.4	60.3	11.72
3	14	2	40.6	21.1	89.1	14.9	58.9	9.46
4	14	2	38	20.3	87.5	14.6	60.5	10
